# Supplementary material for: Risk of Developing Metabolic Syndrome Is Affected by Length of Daily Siesta: Results from a Prospective Cohort Study
Source: MDPI journal article supplement (doi:10.3390/nu13114182), 2021-11-22
Supplement: s1 [file s1]

**Table S1.** Sensitivity analysis: Adjusted odd ratios (aOR)\* and 95% confidence intervals (CI) for the development of the Metabolic Syndrome according to frequency of siesta habit in the SUN cohort

|                      | Any siesta     |                  | Short siesta (≤30mins) |                  | Long siesta (>30mins) |                  |
|----------------------|----------------|------------------|------------------------|------------------|-----------------------|------------------|
| <b>Never</b>         | N              | 3719             | N                      | 5812             | N                     | 5968             |
|                      | Cases          | 120              | Cases                  | 232              | Cases                 | 213              |
|                      | aOR<br>(95%CI) | Ref.             | aOR<br>(95%CI)         | Ref.             | aOR<br>(95%CI)        | Ref.             |
| <b>2 days a week</b> | N              | 1884             | N                      | 1017             | N                     | 1967             |
|                      | Cases          | 65               | Cases                  | 35               | Cases                 | 79               |
|                      | aOR<br>(95%CI) | 1.00 (0.72-1.38) | aOR<br>(95%CI)         | 0.92 (0.63-1.34) | aOR<br>(95%CI)        | 1.12 (0.85-1.48) |
| <b>5 days a week</b> | N              | 527              | N                      | 1337             | N                     | 290              |
|                      | Cases          | 18               | Cases                  | 54               | Cases                 | 13               |
|                      | aOR<br>(95%CI) | 0.95 (0.56-1.60) | aOR<br>(95%CI)         | 0.97 (0.71-1.33) | aOR<br>(95%CI)        | 1.45 (0.79-2.76) |
| <b>7 days a week</b> | N              | 3031             | N                      | 995              | N                     | 936              |
|                      | Cases          | 171              | Cases                  | 53               | Cases                 | 69               |
|                      | aOR<br>(95%CI) | 1.27 (0.98-1.64) | aOR<br>(95%CI)         | 1.00 (0.72-1.38) | aOR<br>(95%CI)        | 1.43 (1.05-1.95) |

\*Adjusted for sex, age, years of university, year of entry into cohort, working hours, lunch at home, hours of night-time sleep, daily TV, smoking pack-years, daily alcohol intake, total daily energy intake, daily coffee intake, Mediterranean Diet Score, special diets, physical activity, social time, prevalent cardiovascular disease, prevalent cancer, prevalent depression, prior history of insomnia, obstructive sleep apnea, snoring, weight gain prior to recruitment, tendency to stress.
